# Supplementary material
Source: publisher figshare collection journal article supplement (https://karger.figshare.com/ndownloader/files/31714577)
Supplement: Supplementary file 1 [file 31714577]

### Supplementary Figure captions

Supplementary figure 1: LA emptying fractions according to Fazekas score, lacunar infarcts, and AF status

Caption: Boxplots of LV peak filling rates according to Fazekas score 0 vs. ≥ 1 and for lacunar infarcts 0 vs. ≥ 1 for participants with sinus rhythm during three months of monitoring, for participants with AF detected during three months of monitoring and for all participants.

**p<0.01

p-values indicate level of significance for comparison of means.

AF, atrial fibrillation
